# Supplementary material
Source: Springer Nature journal article supplement (https://www.springermedizin.de/resource/supplementary/12955_2004_168_MOESM2_ESM.pdf/9559812)

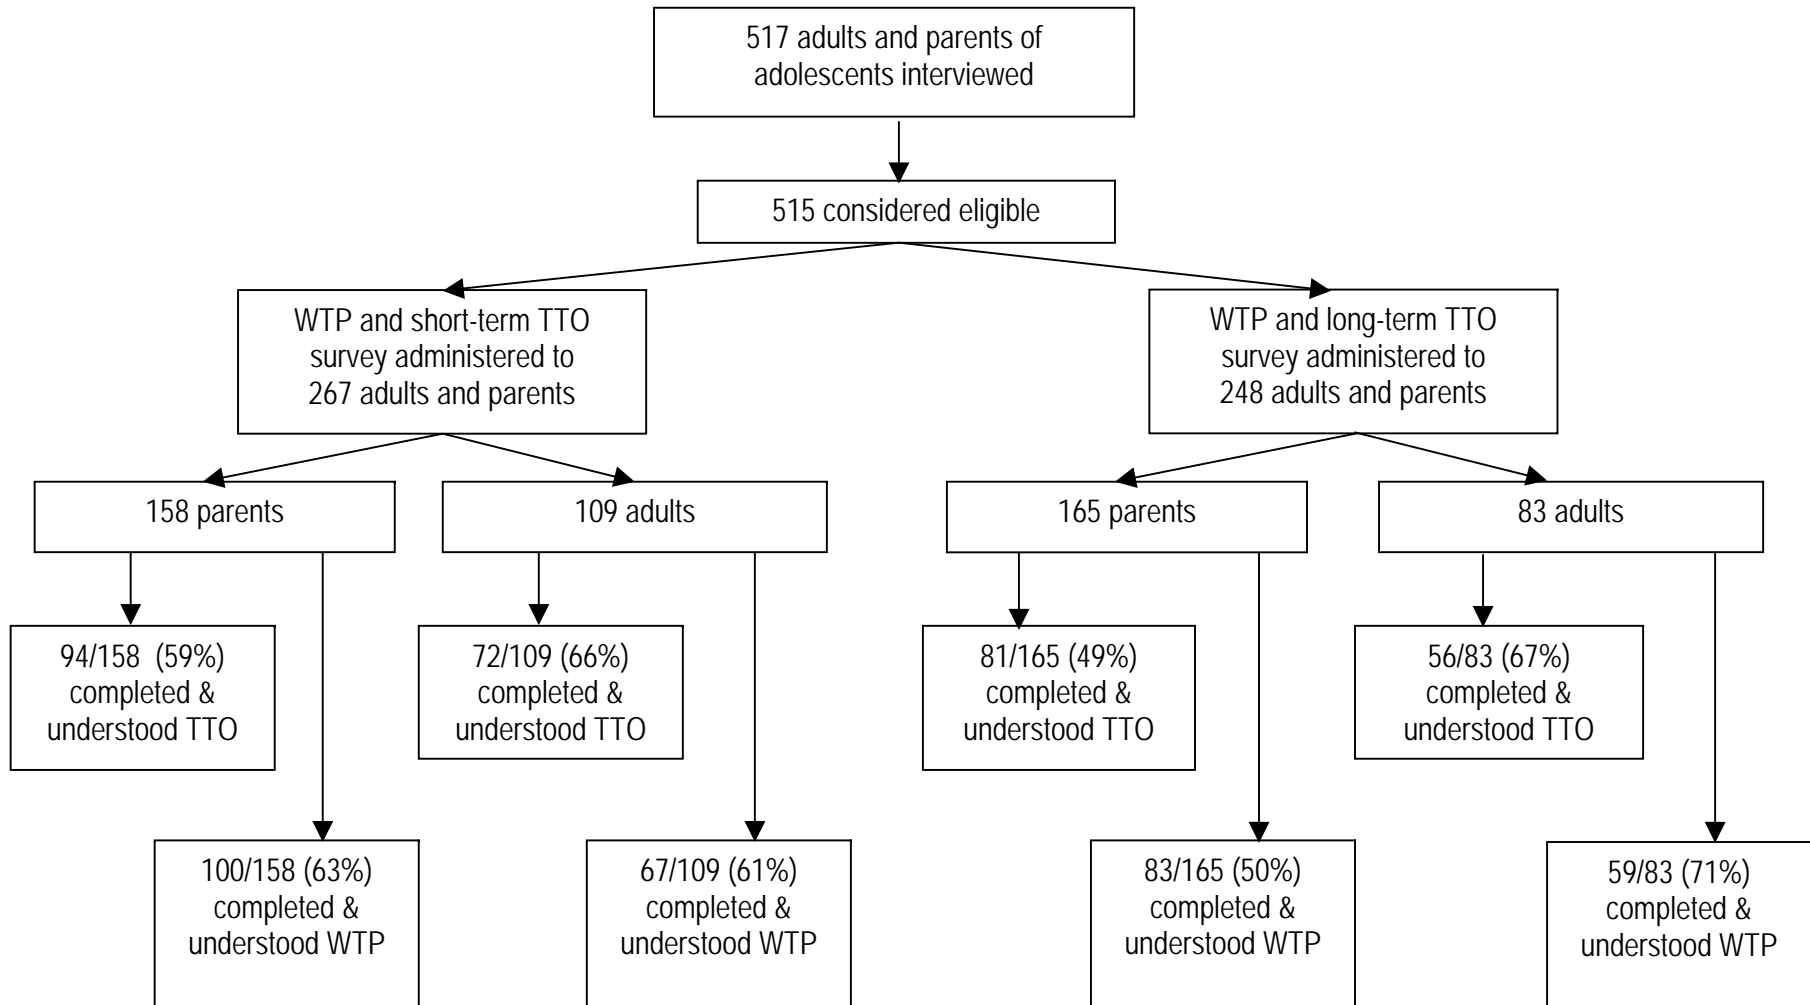

Supplement: MOESM2 [file 9559812]
